# Supplementary material
Source: MDPI journal article supplement (https://www.mdpi.com/2673-4133/4/2/19)
Supplement: s1 [file s1]

## Supplementary material

### “Assessing environmental control on temporal and spatial patterns of larval fish assemblages in a marine protected area.”

Rúben Pereira <sup>1,2,\*</sup>, Sabrina M. Rodrigues <sup>1,2</sup>, Diogo M. Silva <sup>1,2</sup> and Sandra Ramos <sup>1,\*</sup>

<sup>1</sup> CIIMAR, Interdisciplinary Centre of Marine and Environmental Research, University of Porto, Terminal de Cruzeiros do Porto de Leixões, Avenida General Norton de Matos, S/N, 4450-208 Matosinhos, Portugal

<sup>2</sup> ICBAS, Abel Salazar Institute of Biomedical Sciences, University of Porto, Rua de Jorge Viterbo Ferreira n° 228, 4050-313 Porto, Portugal

\* Correspondence: ruben.pereira@ciimar.up.pt (R.P.); ssramos@ciimar.up.pt (S.R.)

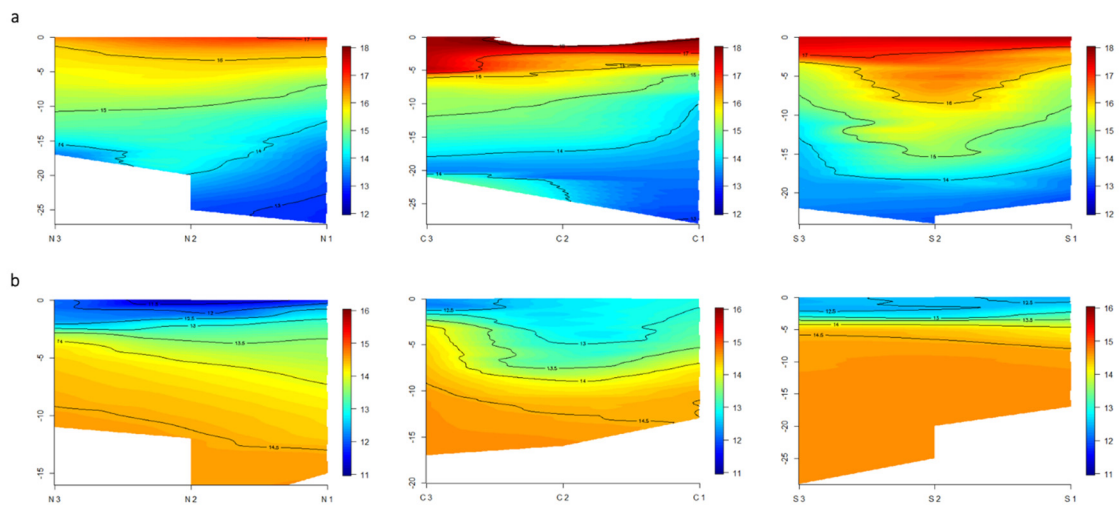

Water column temperature (°C) profile along the PNLN during (a) Summer 2018 and (b) Winter 2019.

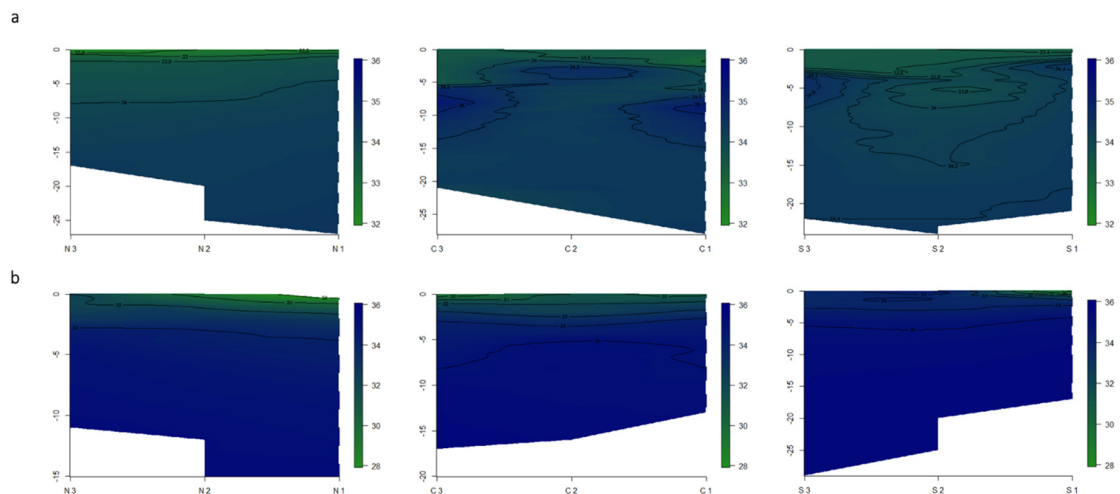

Water column salinity profile along the PNLN during (a) Summer 2018 and (b) Winter 2019.

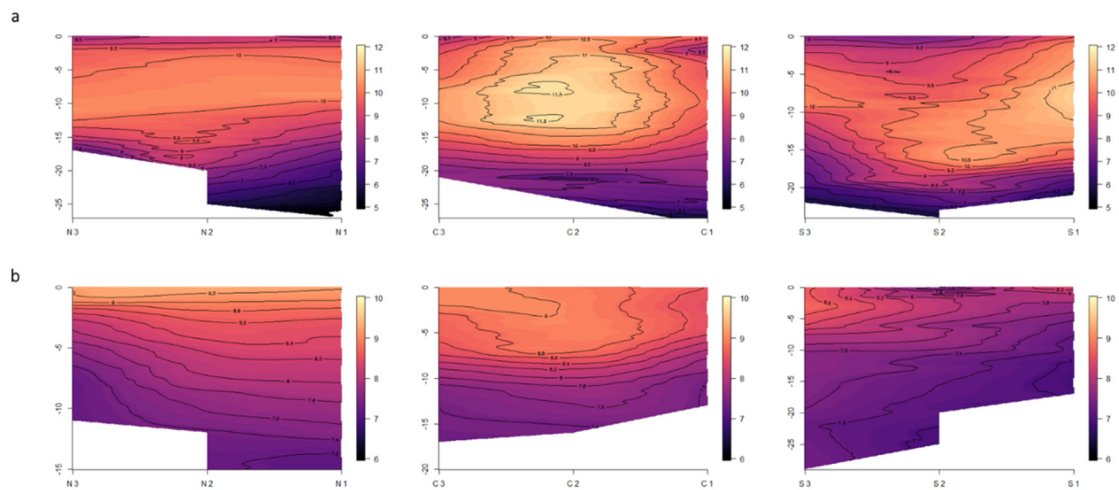

Water column dissolved oxygen ( $\text{mg L}^{-1}$ ) profile along the PNLN during (a) Summer 2018 and (b) Winter 2019.

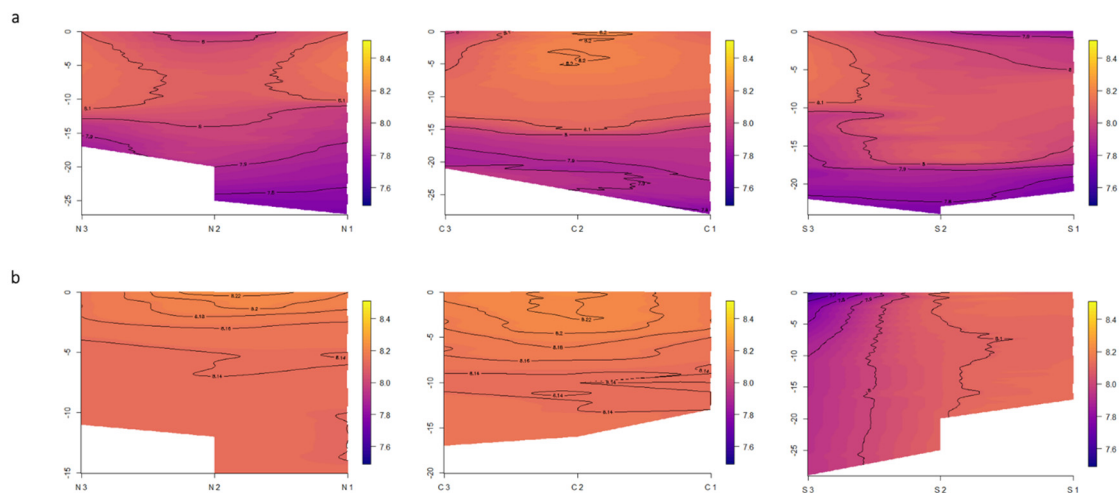

Water column pH levels profile along the PNLN during (a) Summer 2018 and (b) Winter 2019.

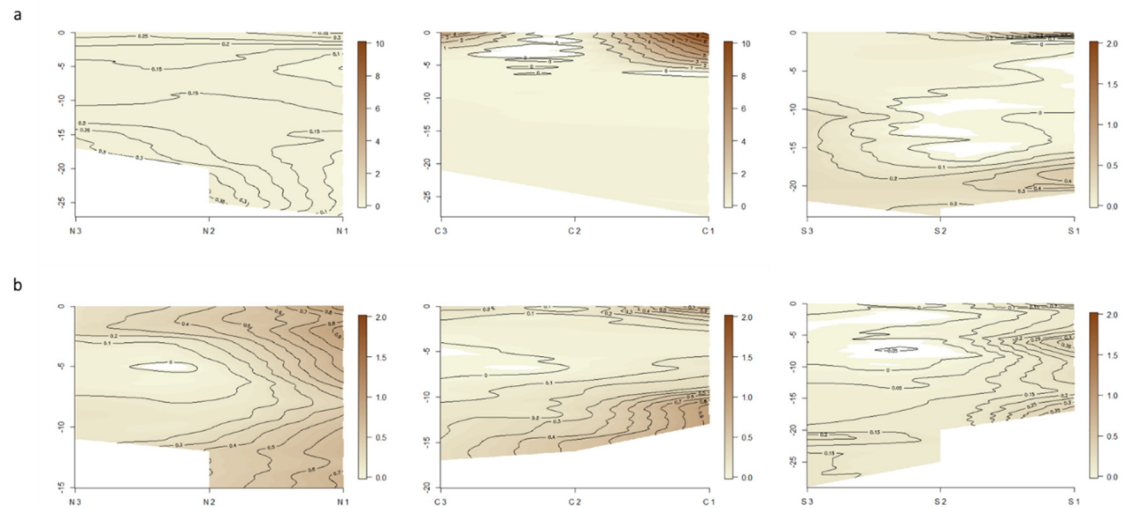

**Water column Turbidity (NTU) profile along the PNLN during (a) Summer 2018 and (b) Winter 2019.**

**Figure S1** Water column parameters (Temperature, Salinity, pH, Dissolved oxygen concentration and Turbidity), cubic interpolated, along the PNLN, during Summer 2018 and Winter 2019 samplings.

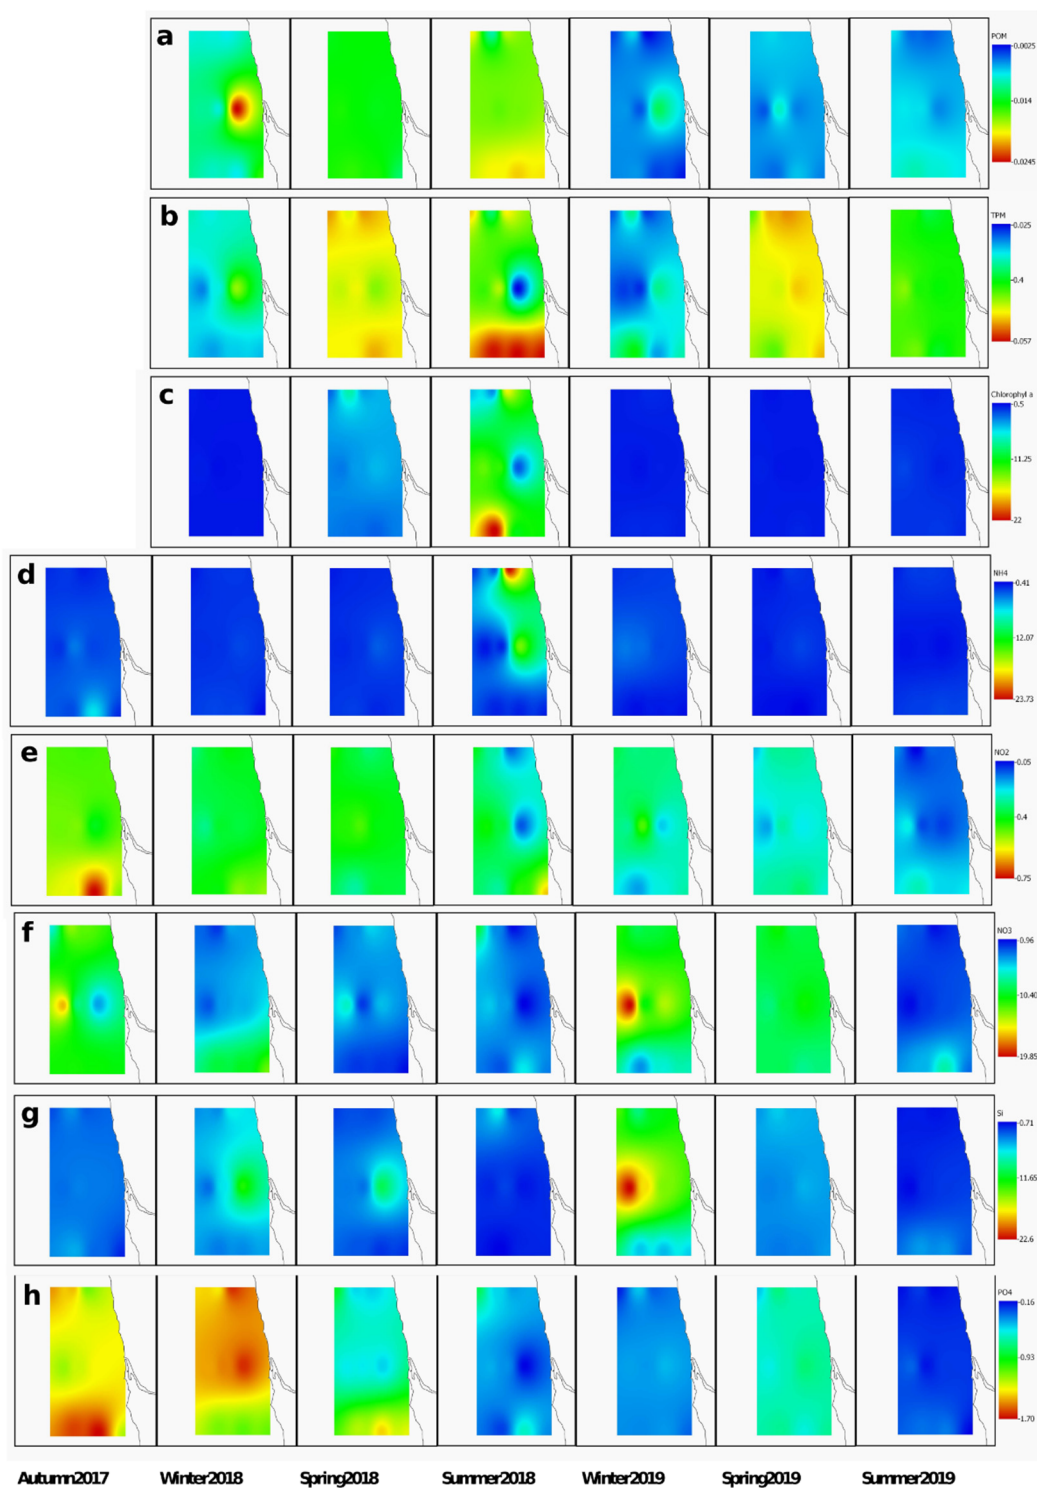

**Figure S2** Spatial-temporal variation of (a) POM (mg L<sup>-1</sup>); (b) TPM (mg L<sup>-1</sup>); (c) chlorophyll a (mg m<sup>-3</sup>); (d) NH<sub>4</sub> (μM L<sup>-1</sup>); (e) NO<sub>2</sub> (μM L<sup>-1</sup>); (f) NO<sub>3</sub> (μM L<sup>-1</sup>); (g) Si (μM L<sup>-1</sup>); (h) PO<sub>4</sub> (μM L<sup>-1</sup>) along the PNLN MPA between Autumn 2017 and Summer 2019.

|                                       | Sampling times |        |        | Transect |       |        | Distance |        |
|---------------------------------------|----------------|--------|--------|----------|-------|--------|----------|--------|
| Source of variation                   | df             | F      | P      | df       | F     | P      | F        | P      |
| Temperature (°C)                      | 6              | 128.93 | <0.001 | 2        | 3.39  | <0.05  | 1.11     | 0.34   |
| Salinity                              | 6              | 20.64  | <0.001 | 2        | 4.0   | <0.05  | 0.56     | 0.57   |
| Oxygen saturation (%)                 | 6              | 24.62  | <0.001 | 2        | 2.09  | 0.14   | 0.80     | 0.46   |
| Dissolved oxygen (mg/L)               | 6              | 21.04  | <0.001 | 2        | 2.13  | 0.13   | 0.51     | 0.61   |
| pH                                    | 6              | 65.42  | <0.001 | 2        | 3.89  | <0.05  | 0.27     | .076   |
| Turbidity (NTU)                       | 6              | 11.03  | <0.001 | 2        | 0.11  | 0.87   | 12.37    | <0.001 |
| TPM (mg L <sup>-1</sup> )             | 6              | 22.84  | <0.001 | 2        | 2.41  | 0.10   | 0.06     | 0.94   |
| POM (mg L <sup>-1</sup> )             | 6              | 21.19  | <0.001 | 2        | 1.52  | 0.23   | 0.61     | 0.55   |
| Chlorophyll a (µg/L)                  | 6              | 18.27  | <0.001 | 2        | 0.28  | 0.76   | 0.28     | 0.76   |
| Zooplankton                           | 2              | 3.92   | <0.05  | -        | -     | -      | -        | -      |
| NO <sub>3</sub> (µM L <sup>-1</sup> ) | 6              | 15.07  | <0.001 | 2        | 0.17  | 0.85   | 0.35     | 0.71   |
| NO <sub>2</sub> (µM L <sup>-1</sup> ) | 6              | 15.41  | <0.001 | 2        | 4.03  | <0.05  | 1.21     | 0.31   |
| Nh <sub>4</sub> (µM L <sup>-1</sup> ) | 6              | 1.73   | 0.14   | 2        | 0.53  | 0.59   | 2.02     | 0.15   |
| PO <sub>4</sub> (µM L <sup>-1</sup> ) | 6              | 105.57 | <0.001 | 2        | 2.67  | 0.08   | 0.45     | 0.64   |
| Si (µM L <sup>-1</sup> )              | 6              | 28.22  | <0.001 | 2        | 11.17 | <0.001 | 0.05     | 0.95   |

**Table S1** Two-way ANOVA analysis for the different environmental factors studies using fixed factors Sampling time – Transect and Sampling time – Distance.
